# Supplementary material for: Forecasting stock prices with a feature fusion LSTM-CNN model using different representations of the same data
Source: PubMed Central journal article supplement (PMC6377125; doi:10.1371/journal.pone.0212320), 2019-02-15
Supplement: pone.0212320.s004.pdf [file pone.0212320.s004.pdf]

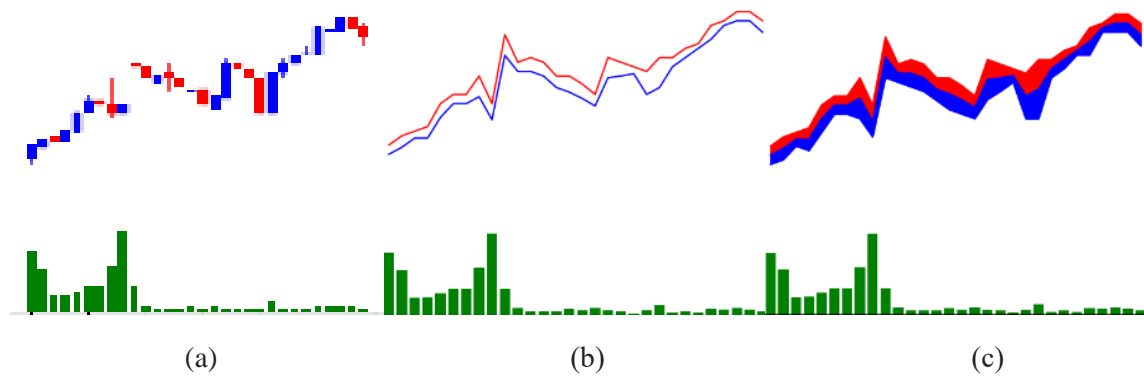

**Fig. An example of four stock chart images using SPY data in testing dataset.**  
(a) Candlebar chart, (b) Linebar chart, and (c) F-linebar chart
