# Supplementary material for: Forecasting stock prices with a feature fusion LSTM-CNN model using different representations of the same data
Source: PubMed Central journal article supplement (PMC6377125; doi:10.1371/journal.pone.0212320), 2019-02-15

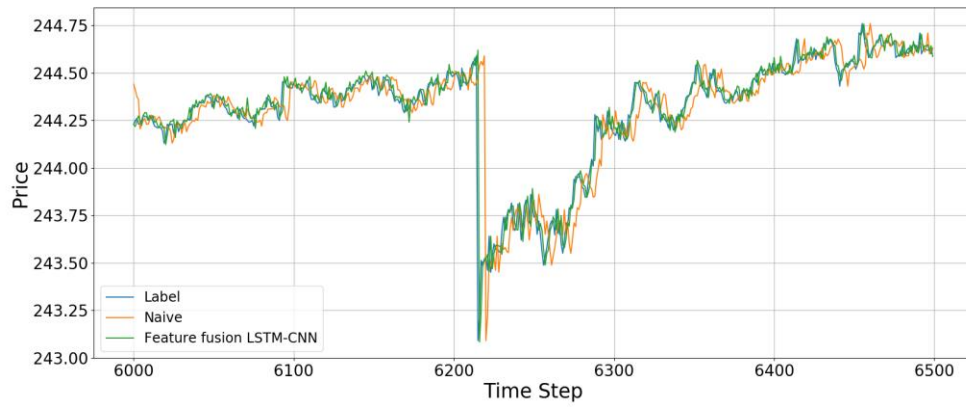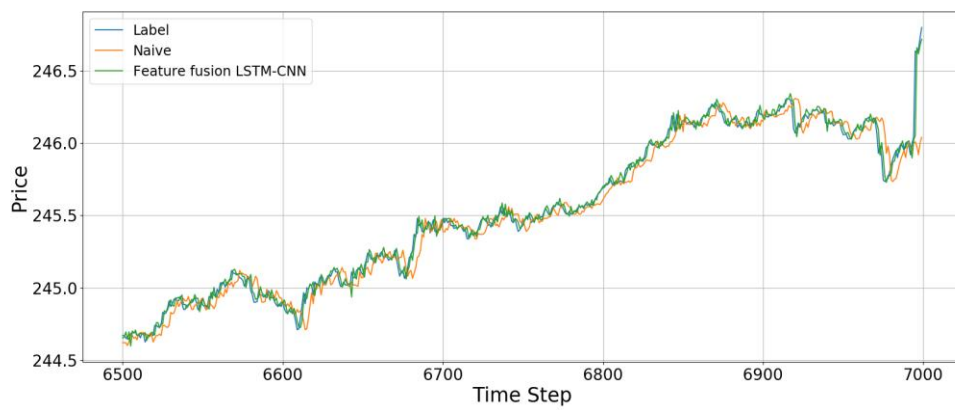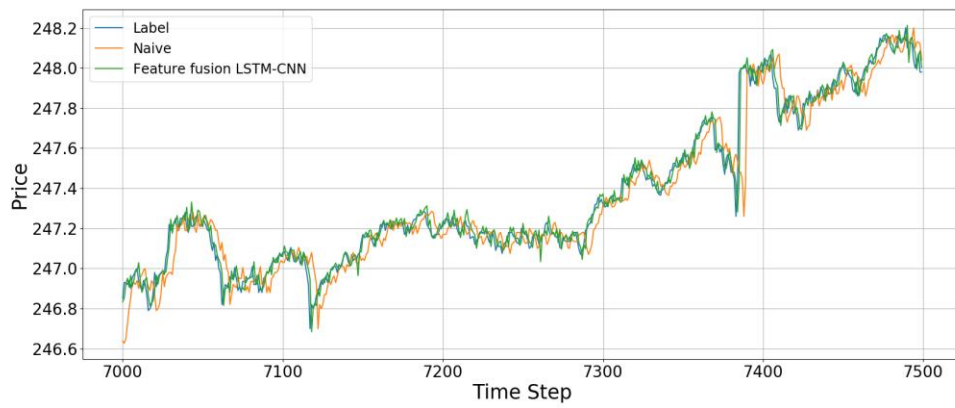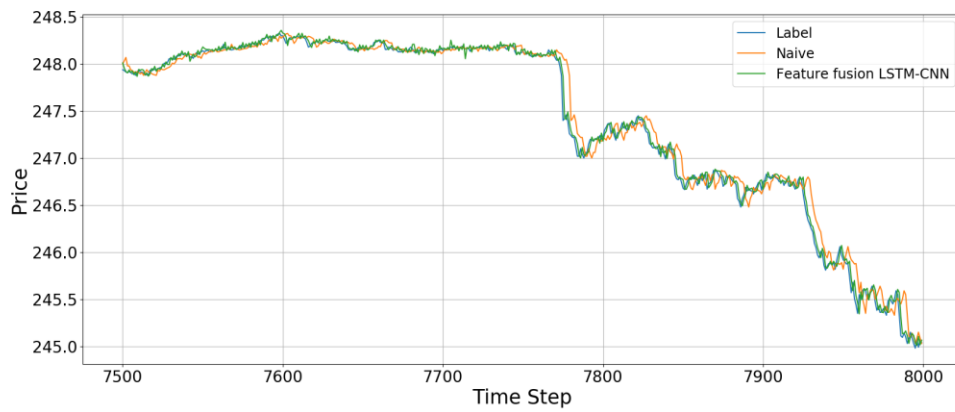

Supplement: pone.0212320.s007.pdf [file pone.0212320.s007.pdf]
